# Supplementary material for: Multispecies and high-spatiotemporal-resolution database of vehicular emissions in Brazil
Source: Copernicus journal article supplement (doi:10.5194/essd-14-2939-2022), 2022-06-28
Supplement: Supplementary file 1 [file essd-14-2939-2022-supplement.zip]

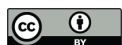

*Supplement of*

## **Multispecies and high-spatiotemporal-resolution database of vehicular emissions in Brazil**

**Leonardo Hoinaski et al.**

*Correspondence to:* Leonardo Hoinaski ([leonardo.hoinaski@ufsc.br](mailto:leonardo.hoinaski@ufsc.br))

- [essd-14-2939-2022-supplement-title-page.pdf](#)
- [Fig.SM08.png](#)
- [Supplementary material.docx](#)

The copyright of individual parts of the supplement might differ from the article licence.
